# Supplementary material for: High Cholesterol-Induced Bone Loss Is Attenuated by Arctiin via an Action in Osteoclasts
Source: MDPI journal article supplement (doi:10.3390/nu14214483), 2022-10-25
Supplement: s1 [file s1]

**Supplementary Table S1:** Primer sequences used for real-time RT-PCR.

| Genes               | Forward 5'-3'                          | Reverse 5'-3'                          |
|---------------------|----------------------------------------|----------------------------------------|
| <b>ATP6v0d2</b>     | <b>TTC AGT TGC TAT CCA GGA CTC GGA</b> | GCA TGT CAT GTA GGT GAG AAA TGT GCT CA |
| Cathepsin K         | GGG CCA GGA TGA AAG TTG TA             | CAC TGC TCT CTT CAG GGC TT             |
| Calcitonin receptor | AGT TGC CCT CTT ATG AAG GAG AAG        | GGA GTG TCG TCC CAG CAC AT             |
| DC-STAMP            | TCC TCC ATG AAC AAA CAG TTC CAA        | AGA CGT GGT TTA GGA ATG CAG CTC        |
| NFAT2               | AAT AAC ATG CGA GCC ATC ATC            | TCA CCC TGG TGT TCT TCC TC             |
| TRAP                | GAC CAC CTT GGC AAT GTC TCT G          | TGG CTG AGG AAG TCA TCT GAG TTG        |
| Nrf2                | CTC GCT GGA AAA AGA AGT G              | CCG TCC AGG AGT TCA GAG G              |
| HO-1                | GCC GAG AAT GCT GAG TTC ATG            | TGG TAC AAG GAA GCC ATC ACC            |
| Catalase            | CCA GCG ACC AGA TGA AGC AG             | CCA CTC TCT CAG GAA TCC GC-3           |
| TRX1                | TTT CCA TCT GGT TCT GCT GAG A          | TGG AAG AAG GGC TTG ATC ATT T          |
| GPX1                | CGC TCT TTA CCT TCC TGC GGA A          | AGT TCC AGG CAA TGT CGT TGC G          |
| SOD1                | GGT GAA CCA GTT GTG TTG TCA GG         | ATG AGG TCC TGC ACT GGT ACA G          |
| SOD2                | TAA CGC GCA GAT CAT GCA GCT G          | AGG CTG AAG AGC GAC CTG AGT T          |
| PRDX1               | TGC CAG ATG GAC AAT TCA AA             | CAG CTG GAC ACA CTT CAC CA             |
| PRDX2               | AAC GCG CAA ATC GGA AAG T              | AGT CCT CAG CAT GGT CGC TAA            |
| PRDX3               | GGC CAC ATG AAC ATC ACA CTG T          | CAA ACT GGA ACG CCT TTA CCA            |
| PRDX4               | TCC TGT TGC GGA CCG AAT                | GAT CTT GGC TTT GCT TAG ATG CA         |
| PRDX5               | GAA AGA AGC AGG TTG GGA GTG T          | CCC AGG GAC TCC AAA CAA AA             |
| PRDX6               | TTG ATG ATA AGG GCA GGG AC             | CTA CCA TCA CGC TCT CTC CC             |
| RPS                 | ATC AGA GAG TTG ACC GCA GTT G          | AAT GAA CCG AAG CAC ACC ATA G          |

Note: ATP6v0d2, (H+ATPaseV0 subunit d2 [V-ATPase-d2]; DC-STAMP, dendritic cell-specific transmembrane protein; NFAT2, nuclear factor of activated T cells 1; TRAP, tartrate-resistant acid phosphatase; Nrf2, nuclear factor erythroid 2-related factor 2; HO-1, heme oxygenase-1; TRX1, thioredoxin 1; GPX1, glutathione peroxidase 1; SOD, superoxide dismutase; PRDX, peroxiredoxin; RPS, 18S ribosomal RNA.

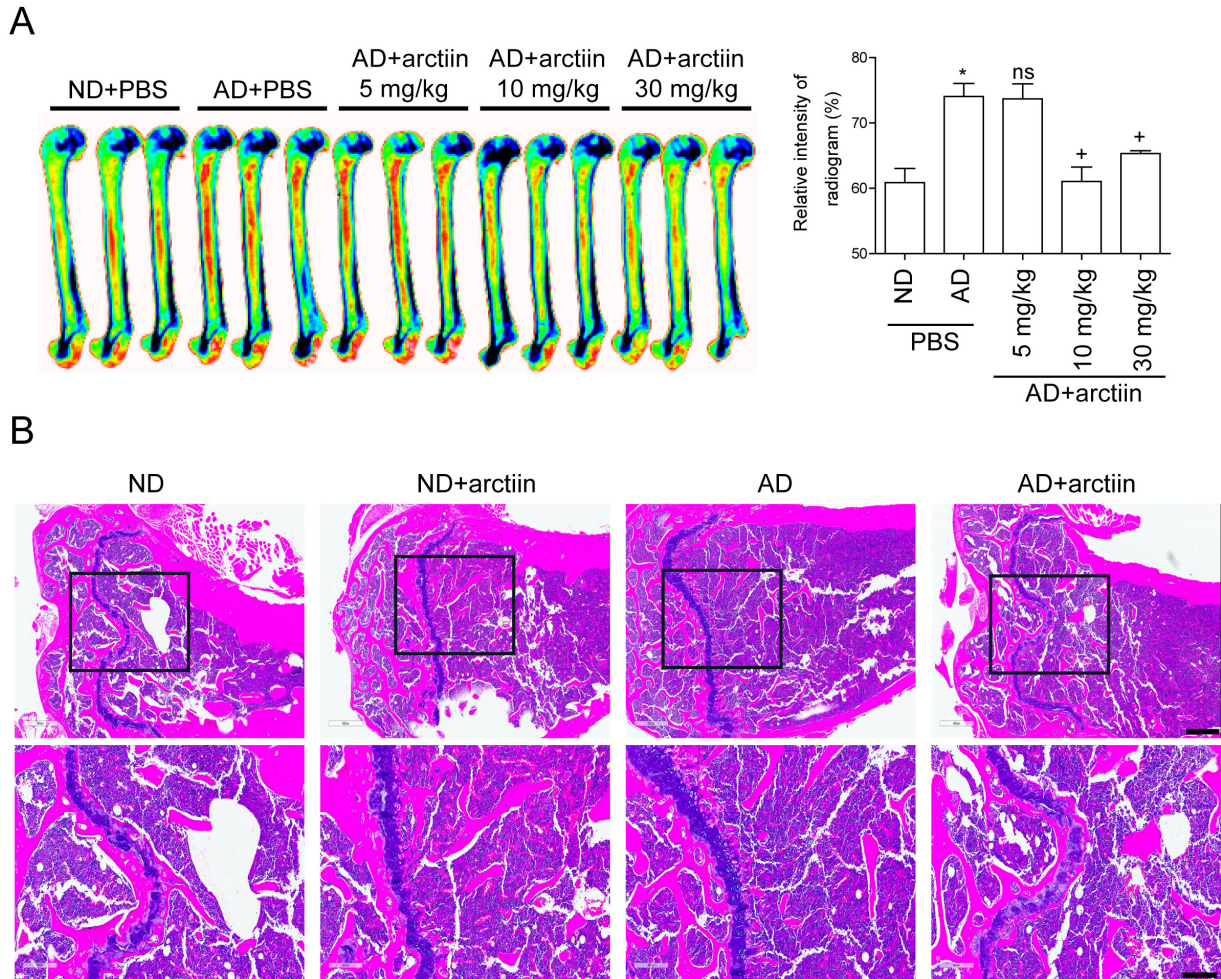

**Supplementary Figure S1.** Arctiin protects mice from atherogenic diet-induced bone loss. **(A)** Representative images and relative intensities of the distal femurs from X-ray radiograms in mice fed with a normal diet (ND) + PBS ( $n = 4$ ), an atherogenic diet (AD) + PBS ( $n = 4$ ), or AD + arctiin (5 mg/kg/d,  $n = 4$ ; 10 mg/kg/d,  $n = 4$ ; 30 mg/kg/d,  $n = 4$ ) for six weeks were measured using the ImageJ program. Radiogram was taken with each of three representative mice. **(B)** Representative H&E staining images of distal femoral in mice fed with ND + PBS ( $n = 5$ ), ND + arctiin (10 mg/kg/d,  $n = 5$ ), AD + PBS ( $n = 5$ ), or AD + arctiin (10 mg/kg/d,  $n = 5$ ) for six weeks. Scale bar:  $\times 40$  (top, 500  $\mu\text{m}$ ),  $\times 100$  (bottom, 200  $\mu\text{m}$ ) in representative photos. \*  $p < 0.05$  compared with the corresponding ND group. +  $p < 0.05$ ; ++  $p < 0.01$  compared with the corresponding AD group. Ns, no significance.

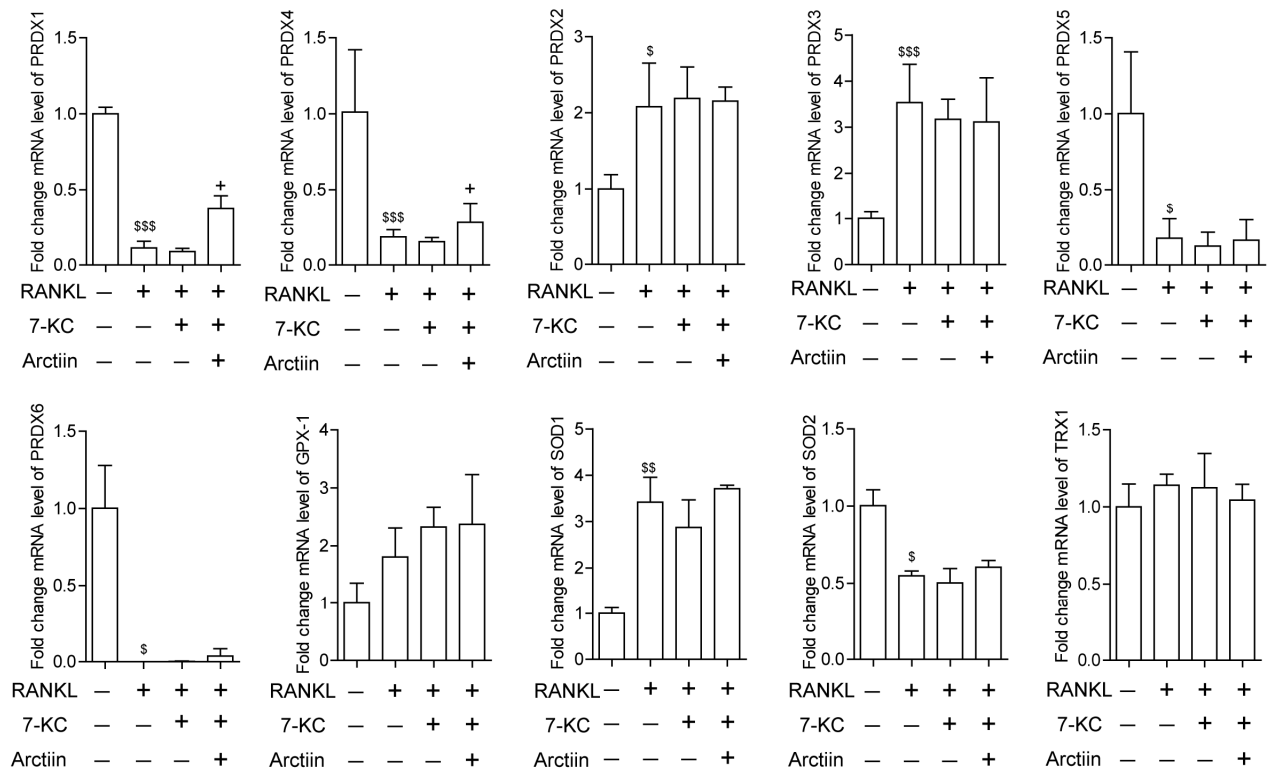

**Supplementary Figure S2.** Arctiin increases the expression of PRDX1 and PRDX4 but does not affect the expression of PRDX2, PRDX3, PRDX5, PRDX6, GPX-1, SOD1, SOD2, and TRX1. RNA from cells stimulated with M-CSF (30 ng/ml), RANKL (40 ng/ml), and 7-KC (7  $\mu$ M) in the presence of arctiin (15  $\mu$ M) for 48 h was analyzed by qPCR. The expression level before RANKL treatment was set to 1. <sup>\$</sup>  $p < 0.05$ ; <sup>\$\$</sup>  $p < 0.01$ ; <sup>\$\$\$</sup>  $p < 0.001$  compared with BMMS. <sup>+</sup>  $p < 0.05$  compared with RANKL and 7-KC-treated cells. Similar results were obtained in three independent sets of experiments.

A

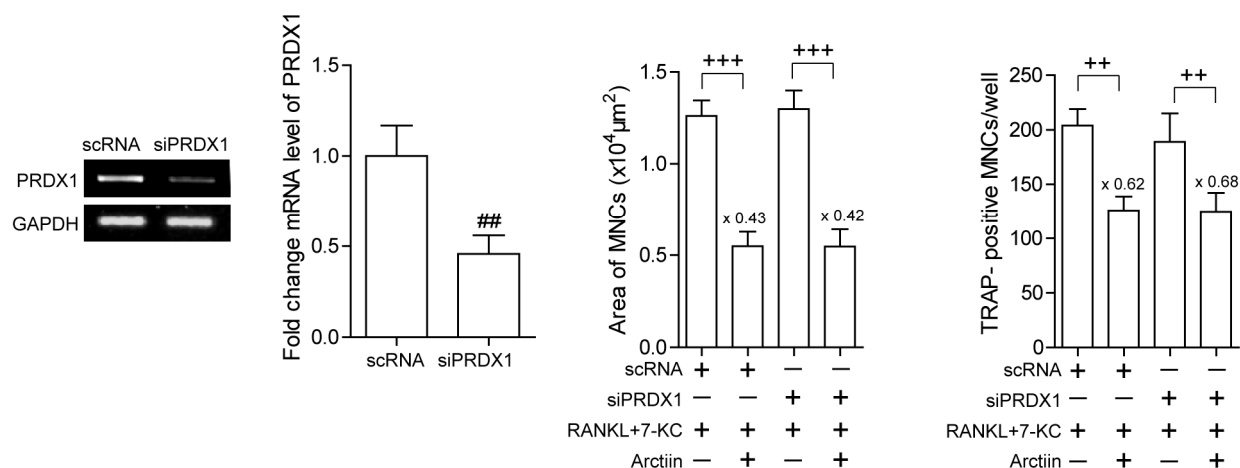

B

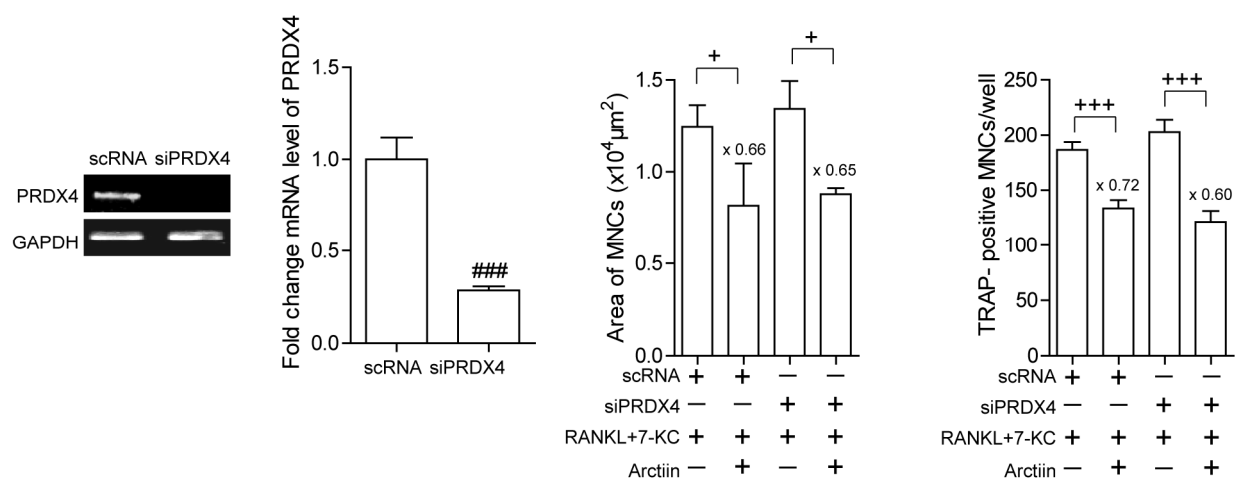

**Supplementary Figure S3.** Inhibition of PRDX1 or PRDX4 expression does not affect the activity of arctiin on OC differentiation. (A,B) BMMs were transfected with scRNA, siPRDX1, or PRDX4 and further incubated with M-CSF (30 ng/ml), RANKL (40 ng/ml), and 7-KC (7  $\mu$ M) in the presence or absence of arctiin (15  $\mu$ M). The down-regulation of PRDX1 and PRDX4 by siRNA was confirmed by reverse transcription (RT)-PCR and qPCR. The cells were fixed after 65 h, and more than 100 TRAP-positive MNCs in each culture were randomly selected. TRAP-positive MNCs and the OC area were analyzed. <sup>+</sup>  $p < 0.05$ ; <sup>++</sup>  $p < 0.01$ ; <sup>+++</sup>  $p < 0.001$  compared with RANKL and 7-KC-treated cells. <sup>##</sup>  $p < 0.01$ ; <sup>###</sup>  $p < 0.001$  compared with the scRNA-treated cells. Similar results were obtained in three independent sets of experiments.

Figure 3A

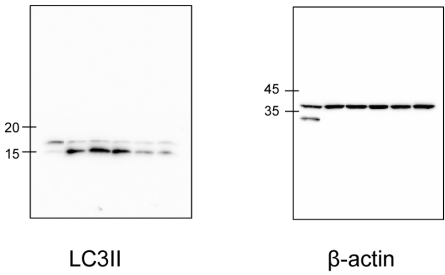

Figure 3C

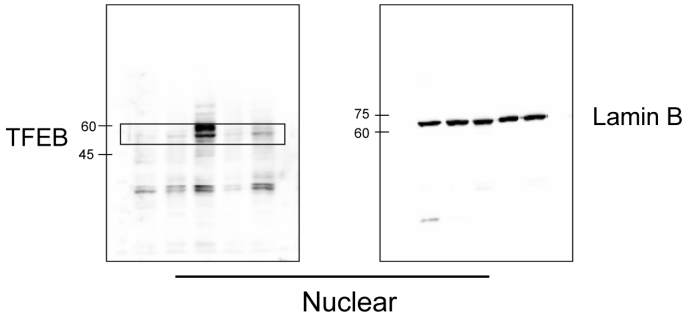

Figure 3C

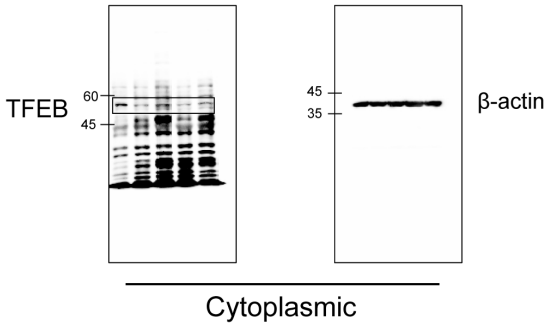

Figure 4C

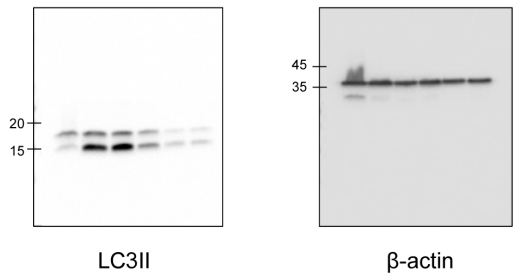

Figure 4E

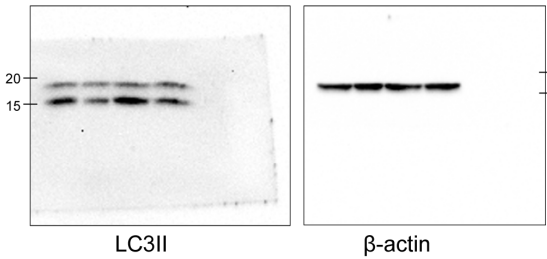

Figure 4F

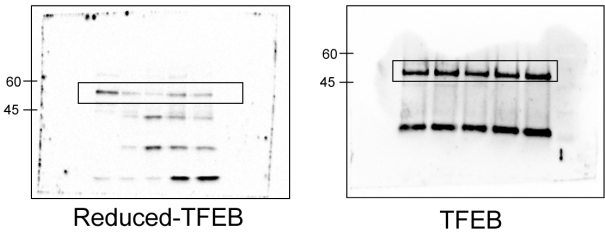

Figure 4E RT-PCR

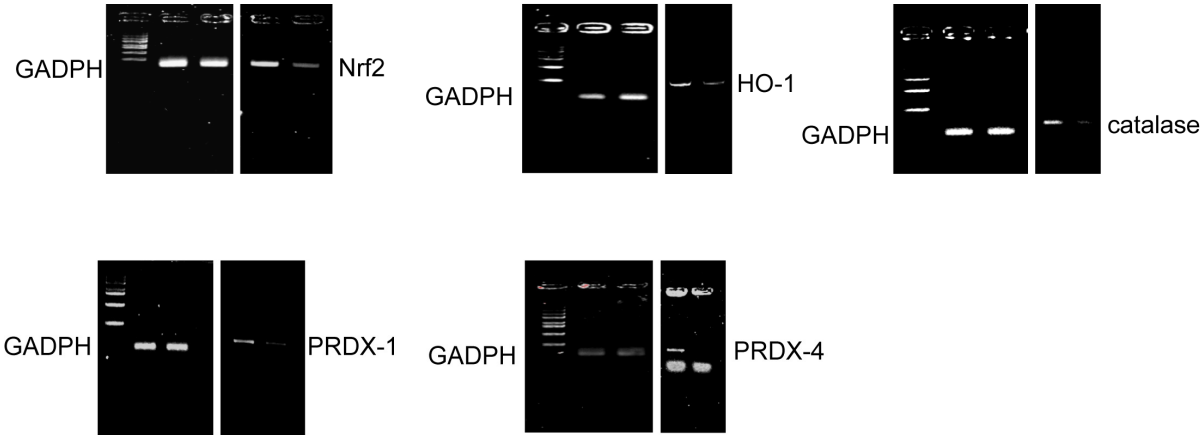

**Supplementary Figure S4.** The entire uncropped images of the original Western blots and reverse transcription polymerase chain reaction.
